# Supplementary material
Source: MDPI journal article supplement (https://www.mdpi.com/1424-8247/14/6/579)
Supplement: s1 [file s1]

## Calcium Chelidonate: Semi-synthesis, Crystallography, and Osteoinductive Activity In Vitro and In Vivo

Elena Avdeeva<sup>1\*</sup>, Ekaterina Porokhova<sup>2</sup>, Igor Khlusov<sup>2,3</sup>, Tatyana Rybalova<sup>4,6</sup>, Elvira Shults<sup>5,6</sup>, Larisa Litvinova<sup>7</sup>, Valeria Shupletsova<sup>7</sup>, Olga Khaziakhmatova<sup>7</sup>, Irina Sukhodolo<sup>2</sup>, and Mikhail Belousov<sup>1,3</sup>

<sup>1</sup> Department of Pharmaceutical Analysis, Siberian State Medical University, Tomsk, 634050, Russia; mvb63@mail.ru (M.B)

<sup>2</sup> Department of Morphology and General Pathology, Siberian State Medical University, Tomsk, 634050, Russia; porohova\_e@mail.ru (E.P.); staranie@mail.ru (I.S.); khlusov63@mail.ru (I.K.)

<sup>3</sup> Research School of Chemistry & Applied Biomedical Sciences, Tomsk Polytechnic University, Tomsk, 634050, Russia

<sup>4</sup> Center of Spectral Investigations, Novosibirsk Institute of Organic Chemistry, Siberian Branch, Novosibirsk, 630090, Russia; rybalova@nioch.nsc.ru (T.R)

<sup>5</sup> Laboratory of Medicinal Chemistry, Novosibirsk Institute of Organic Chemistry, Siberian Branch, Novosibirsk, 630090, Russia; schultz@nioch.nsc.ru (E.S.)

<sup>6</sup> Novosibirsk State University, 2 Pirogova St., Novosibirsk 630090, Russia

<sup>7</sup> Basic Laboratory of Immunology and Cell Biotechnology, Immanuel Kant Baltic Federal University, Kaliningrad, 236041, Russia; larisalitvinova@yandex.ru (L.L.); vshupletsova@mail.ru (V.S.); hazik36@mail.ru (O.K.)

\* Correspondence: elenaavdeev@yandex.ru; Tel.: +7-983-344-7381 (E.A.)

**Table S1.** Crystallographic parameters and details of experiment solution and refinement for semi-synthetic (**II**) and natural (**I**) forms of  $[\text{Ca}(\text{ChA})(\text{H}_2\text{O})_3]_n$

|                                 | avd2_synt ( <b>II</b> )            | avd2_nat ( <b>I</b> )              |
|---------------------------------|------------------------------------|------------------------------------|
| Empirical formula               | $\text{C}_7\text{H}_8\text{CaO}_9$ | $\text{C}_7\text{H}_8\text{CaO}_9$ |
| Formula weight                  | 276.21                             | 276.21                             |
| Crystal system                  | Orthorhombic                       | Orthorhombic                       |
|                                 |                                    |                                    |
| Space group                     | Pna2(1)                            | Pna2(1)                            |
| Unit cell dimensions            | a = 8.380(2) Å alpha = 90 deg.     | a = 8.419(13) Å alpha = 90 deg.    |
|                                 | b = 19.702(4) Å beta = 90 deg      | b = 19.82(3) Å beta = 90 deg.      |
|                                 | c = 6.1653(14) Å gamma = 90 de     | c = 6.207(8) Å gamma = 90 deg.     |
| Volume                          | 1017.9(4) Å <sup>3</sup>           | 1036(3) Å <sup>3</sup>             |
| Z, Calculated density           | 4, 1.802 Mg/m <sup>3</sup>         | 4, 1.772 Mg/m <sup>3</sup>         |
| Absorption coefficient          | 0.655 mm <sup>-1</sup>             | 0.644 mm <sup>-1</sup>             |
| F(000)                          | 568                                | 568                                |
| Crystal size                    | 0.30 x 0.09 x 0.005 mm             | 0.30 x 0.09 x 0.01 mm              |
| Theta range for data collection | 2.64 to 25.93 deg.                 | 2.63 to 24.79 deg.                 |

|                                   |                                             |                                             |
|-----------------------------------|---------------------------------------------|---------------------------------------------|
| Limiting indices                  | -9<=h<=10, -24<=k<=24, -7<=l<=7             | -8<=h<=9, -23<=k<=20, -7<=l<=6              |
| Reflections collected / unique    | 9349 / 1966 [R(int) = 0.0487]               | 4896 / 1608 [R(int) = 0.1379]               |
| Completeness to theta = 24.79     | 99.1 %                                      | 99.1 %                                      |
| Absorption correction             | Semi-empirical from equivalents             | Semi-empirical from equivalents             |
| Max. and min. transmission        | 0.8620 and 0.7714                           | 0.8620 and 0.5294                           |
| Refinement method                 | Full-matrix least-squares on F <sup>2</sup> | Full-matrix least-squares on F <sup>2</sup> |
| Data / restraints / parameters    | 1966 / 7 / 179                              | 1608 / 11 / 166                             |
| Goodness-of-fit on F <sup>2</sup> | 1.065                                       | 1.000                                       |
| Final R indices [I>2sigma(I)]     | R1 = 0.0347, wR2 = 0.0765                   | R1 = 0.0721, wR2 = 0.1508                   |
| R indices (all data)              | R1 = 0.0446, wR2 = 0.0801                   | R1 = 0.1230, wR2 = 0.1716                   |
| Absolute structure parameter      | 0.12(4)                                     | 0.00(12)                                    |
| Largest diff. peak and hole       | 0.322 and -0.220 e.A <sup>-3</sup>          | 0.716 and -0.603 e.A <sup>-3</sup>          |
